# Supplementary material for: A stacking-based model for predicting 30-day all-cause hospital readmissions of patients with acute myocardial infarction
Source: Springer Nature journal article supplement (doi:10.1186/s12911-020-01358-w), 2020-12-01
Supplement: MOESM1 [file 18681836]

## Additional file 1 - Detailed clinical variables.

| Category                            | Variable name                                    | Range       | Missing<br>(n(%)) | Notes                                        |
|-------------------------------------|--------------------------------------------------|-------------|-------------------|----------------------------------------------|
| <b>Demographics</b>                 | Sex                                              | Male,Female | 0 (0%)            |                                              |
|                                     | Age                                              | 18-99       | 0 (0%)            |                                              |
|                                     | Ethnic                                           | Yes,No      | 0 (0%)            | Han nationality or not                       |
|                                     | Work                                             | 0,1,2...14  | 24 (0.73%)        | Different job categories                     |
|                                     | Marital status                                   | Yes,No      | 2 (0.06%)         |                                              |
|                                     | Address                                          | 0,1,2       | 224 (6.82%)       | This city, inside province, outside province |
|                                     | Physical condition of mother                     | 0,1,2       | 0 (0%)            | Dead, alive, ill                             |
|                                     | Physical condition of father                     | 0,1,2       | 0 (0%)            | Dead, alive, ill                             |
| <b>Hospitalization information</b>  | Length of stay (days)                            | 1-103       | 0 (0%)            |                                              |
|                                     | The month of discharge                           | 1-12        | 0 (0%)            |                                              |
|                                     | Payment Method                                   | 0,1,2...18  | 0 (0%)            | Different payment method                     |
|                                     | Admission condition                              | 0,1,2       | 363 (11.06%)      | Danger, urgency, general                     |
|                                     | Admission pathway                                | 0,1,2       | 0 (0%)            | Outpatient, emergency, others                |
| <b>Medical history</b>              | History of infection                             | Yes,No      | 7 (0.21%)         |                                              |
|                                     | History of trauma                                | Yes,No      | 3 (0.09%)         |                                              |
|                                     | History of surgery                               | Yes,No      | 3 (0.09%)         |                                              |
|                                     | History of allergy                               | Yes,No      | 7 (0.21%)         |                                              |
|                                     | History of blood transfusion                     | Yes,No      | 14 (0.43%)        |                                              |
| <b>Past hospitalization history</b> | Frequency of hospitalizations in the past 1 week | 0-3         | 0 (0%)            |                                              |

|                               |                                                                |      |        |                       |
|-------------------------------|----------------------------------------------------------------|------|--------|-----------------------|
|                               | Frequency of hospitalizations in the past 1 month              | 0-4  | 0 (0%) |                       |
|                               | Frequency of hospitalizations in the past 3 months             | 0-7  | 0 (0%) |                       |
|                               | Frequency of hospitalizations in the past 6 months             | 0-8  | 0 (0%) |                       |
|                               | Frequency of hospitalizations in the past 1 year               | 0-15 | 0 (0%) |                       |
| <b>Comorbidities (ICD-10)</b> | Malignant neoplasms (C00-C97)                                  | 0-10 | 0 (0%) | Number of occurrences |
|                               | Aplastic and other anaemias (D60-D64)                          | 0-10 | 0 (0%) | Number of occurrences |
|                               | Disorders of thyroid gland (E00-E07)                           | 0-10 | 0 (0%) | Number of occurrences |
|                               | Diabetes mellitus (E10-E14)                                    | 0-10 | 0 (0%) | Number of occurrences |
|                               | Metabolic disorders (E70-E90)                                  | 0-10 | 0 (0%) | Number of occurrences |
|                               | Episodic and paroxysmal disorders (G40-G47)                    | 0-10 | 0 (0%) | Number of occurrences |
|                               | Hypertensive diseases (I10-I15)                                | 0-10 | 0 (0%) | Number of occurrences |
|                               | Cerebrovascular diseases (I60-I69)                             | 0-10 | 0 (0%) | Number of occurrences |
|                               | Diseases of arteries, arterioles and capillaries (I70-I79)     | 0-10 | 0 (0%) | Number of occurrences |
|                               | Influenza and pneumonia (J09-J18)                              | 0-10 | 0 (0%) | Number of occurrences |
|                               | Chronic lower respiratory diseases (J40-J47)                   | 0-10 | 0 (0%) | Number of occurrences |
|                               | Other diseases of pleura (J90-J94)                             | 0-10 | 0 (0%) | Number of occurrences |
|                               | Other diseases of the respiratory system (J95-J99)             | 0-10 | 0 (0%) | Number of occurrences |
|                               | Diseases of oesophagus, stomach and duodenum (K20-K31)         | 0-10 | 0 (0%) | Number of occurrences |
|                               | Diseases of liver (K70-K77)                                    | 0-10 | 0 (0%) | Number of occurrences |
|                               | Disorders of gallbladder, biliary tract and pancreas (K80-K87) | 0-10 | 0 (0%) | Number of occurrences |
|                               | Other diseases of the digestive system (K90-K93)               | 0-10 | 0 (0%) | Number of occurrences |
|                               | Arthropathies (M00-M25)                                        | 0-10 | 0 (0%) | Number of occurrences |
|                               | Dorsopathies (M40-M54)                                         | 0-10 | 0 (0%) | Number of occurrences |

|                                |                                                                                                                                              |            |             |                       |
|--------------------------------|----------------------------------------------------------------------------------------------------------------------------------------------|------------|-------------|-----------------------|
|                                | Renal failure (N17-N19)                                                                                                                      | 0-10       | 0 (0%)      | Number of occurrences |
|                                | Diseases of male genital organs (N40-N51)                                                                                                    | 0-10       | 0 (0%)      | Number of occurrences |
|                                | Symptoms and signs involving the circulatory and respiratory systems (R00-R09)                                                               | 0-10       | 0 (0%)      | Number of occurrences |
|                                | General symptoms and signs (R50-R69)                                                                                                         | 0-10       | 0 (0%)      | Number of occurrences |
|                                | Abnormal findings on diagnostic imaging and in function studies, without diagnosis (R90-R94)                                                 | 0-10       | 0 (0%)      | Number of occurrences |
|                                | Persons with potential health hazards related to family and personal history and certain conditions influencing health status (Z80-Z99)      | 0-10       | 0 (0%)      | Number of occurrences |
| <b>Procedures (ICD-9-CM-3)</b> | Adjunct vascular system procedures (00.4)                                                                                                    | 0-10       | 0 (0%)      | Number of occurrences |
|                                | Removal of coronary artery obstruction and insertion of stent(s) (36.0)                                                                      | 0-10       | 0 (0%)      | Number of occurrences |
|                                | Procedures on blood vessels (00.6)                                                                                                           | 0-10       | 0 (0%)      | Number of occurrences |
|                                | Diagnostic procedures on heart and pericardium (00.6)                                                                                        | 0-10       | 0 (0%)      | Number of occurrences |
|                                | Angiocardiology using contrast material (88.5)                                                                                               | 0-10       | 0 (0%)      | Number of occurrences |
|                                | Implantation of heart and circulatory assist system(s) (37.6)                                                                                | 0-10       | 0 (0%)      | Number of occurrences |
|                                | Other continuous invasive mechanical ventilation (96.7)                                                                                      | 0-10       | 0 (0%)      | Number of occurrences |
|                                | Nonoperative intubation of gastrointestinal and respiratory tracts (96.0)                                                                    | 0-10       | 0 (0%)      | Number of occurrences |
|                                | Insertion, revision, replacement, and removal of leads; insertion of temporary pacemaker system; or revision of cardiac device pocket (37.7) | 0-10       | 0 (0%)      | Number of occurrences |
|                                | Intravascular imaging of blood vessels (00.2)                                                                                                | 0-10       | 0 (0%)      | Number of occurrences |
|                                | Puncture of vessel (38.9)                                                                                                                    | 0-10       | 0 (0%)      | Number of occurrences |
| <b>Physical examinations</b>   | Heart rate (Median (1th, 3th quartile))                                                                                                      | 78 (68,89) | 175 (5.33%) |                       |
|                                | Respiratory rate (Median (1th, 3th quartile))                                                                                                | 20 (19,20) | 7 (0.21%)   |                       |

|                                |                                                                            |                  |               |                              |
|--------------------------------|----------------------------------------------------------------------------|------------------|---------------|------------------------------|
|                                | Body temperature (Median (1th, 3th quartile))                              | 36.4 (36.2,36.5) | 9 (0.27%)     |                              |
|                                | Pulse (Median (1th, 3th quartile))                                         | 78 (68,89)       | 2 (0.06%)     |                              |
|                                | Edema                                                                      | Yes,No           | 1 (0.03%)     |                              |
|                                | Subcutaneous hemorrhage                                                    | Yes,No           | 0 (0%)        |                              |
|                                | Cardiac Murmurs                                                            | Yes,No           | 0 (0%)        |                              |
|                                | Systolic pressure (Median (1th, 3th quartile))                             | 122 (107,138)    | 8 (0.24%)     |                              |
|                                | Diastolic pressure (Median (1th, 3th quartile))                            | 73 (64,83)       | 8 (0.24%)     |                              |
|                                | Heart boundary                                                             | 0,1...4          | 0 (0%)        |                              |
|                                | First heart sound                                                          | 0,1...5          | 0 (0%)        |                              |
|                                | Second heart sound                                                         | 0,1...4          | 0 (0%)        |                              |
|                                | Arrhythmia                                                                 | Yes,No           | 0 (0%)        |                              |
|                                | Centimeter distance between heart and sternum (Median (1th, 3th quartile)) | 7.5 (7.5,7.5)    | 207 (6.31%)   |                              |
| <b>Ultrasonic examinations</b> | Ejection Fraction (%) (Median (1th, 3th quartile))                         | 55 (45,62)       | 408 (12.43%)  |                              |
|                                | Left ventricle (mm) (Median (1th, 3th quartile))                           | 50 (46,54)       | 414 (12.61%)  |                              |
|                                | Left atrium (mm) (Median (1th, 3th quartile))                              | 36 (32,40)       | 562 (17.12%)  |                              |
|                                | End-diastolic volume (ml) (Median (1th, 3th quartile))                     | 106 (90,126)     | 665 (20.26%)  |                              |
|                                | Stroke volume (ml) (Median (1th, 3th quartile))                            | 57 (47,69)       | 668 (20.35%)  |                              |
|                                | End-systolic volume (ml) (Median (1th, 3th quartile))                      | 47 (35,63)       | 681 (20.74%)  |                              |
|                                | Interventricular septal thickness (mm) (Median (1th, 3th quartile))        | 10 (9,12)        | 871 (26.53%)  |                              |
|                                | Aortic                                                                     | 0,1,2            | 1976 (60.19%) | Normal, abnormal, not tested |
|                                | Aortic orifice velocity                                                    | 0,1,2            | 1242 (37.83%) | Normal, abnormal, not tested |
|                                | A peak of mitral valve                                                     | 0,1,2            | 2111 (64.3%)  | Normal, abnormal, not tested |
|                                | End-diastolic dimension                                                    | 0,1,2            | 2490 (75.85%) | Normal, abnormal, not tested |

|                  |                                          |        |                       |                              |
|------------------|------------------------------------------|--------|-----------------------|------------------------------|
|                  | End-systolic dimension                   | 0,1,2  | 2490 (75.85%)         | Normal, abnormal, not tested |
|                  | Early diastolic velocity of mitral valve | 0,1,2  | 2055 (62.6%)          | Normal, abnormal, not tested |
|                  | E peak of mitral valve                   | 0,1,2  | 1705 (51.93%)         | Normal, abnormal, not tested |
|                  | Left ventricular posterior wall          | 0,1,2  | 1376 (41.91%)         | Normal, abnormal, not tested |
|                  | Main pulmonary artery                    | 0,1,2  | 2252 (68.6%)          | Normal, abnormal, not tested |
|                  | Pulmonary valve orifice velocity         | 0,1,2  | 2413 (73.5%)          | Normal, abnormal, not tested |
|                  | Right atrium                             | 0,1,2  | 1633 (49.74%)         | Normal, abnormal, not tested |
|                  | Right ventricle                          | 0,1,2  | 1545 (47.06%)         | Normal, abnormal, not tested |
| <b>Medicines</b> | $\beta$ -receptor blocker                | 0-2    | 0 (0%)                | Number of occurrences        |
|                  | Calcium channel blockers                 | 0-3    | 0 (0%)                | Number of occurrences        |
|                  | Angiotensin converting enzyme inhibitors | 0-2    | 0 (0%)                | Number of occurrences        |
|                  | Angiotensin receptor blocks              | 0-1    | 0 (0%)                | Number of occurrences        |
|                  | Statins                                  | 0-2    | 0 (0%)                | Number of occurrences        |
|                  | Diuretic                                 | 0-4    | 0 (0%)                | Number of occurrences        |
|                  | Direct vasodilator                       | 0-6    | 0 (0%)                | Number of occurrences        |
|                  | Inotropic agents                         | 0-2    | 0 (0%)                | Number of occurrences        |
|                  | Oral nitroglycerin                       | 0-2    | 0 (0%)                | Number of occurrences        |
|                  | Other nitroglycerin                      | 0-2    | 0 (0%)                | Number of occurrences        |
|                  | Aspirin                                  | 0-1    | 0 (0%)                | Number of occurrences        |
|                  | Antiplatelet drugs                       | 0-4    | 0 (0%)                | Number of occurrences        |
|                  | Anticoagulant drugs                      | 0-4    | 0 (0%)                | Number of occurrences        |
|                  | Anti-arrhythmia agent                    | 0-3    | 0 (0%)                | Number of occurrences        |
| Insulin          | 0-3                                      | 0 (0%) | Number of occurrences |                              |

|                                                         | Hypoglycemic drugs                                        | 0-3               | 0 (0%)       | Number of occurrences |
|---------------------------------------------------------|-----------------------------------------------------------|-------------------|--------------|-----------------------|
| <b>Laboratory tests</b><br>(Median (1th, 3th quartile)) | Absolute value of basophil_max (10 <sup>9</sup> /L)       | 0.02 (0.02,0.04)  | 476 (14.5%)  |                       |
|                                                         | Absolute value of basophil_median (10 <sup>9</sup> /L)    | 0.02 (0.01,0.03)  | 476 (14.5%)  |                       |
|                                                         | Absolute value of basophil_min (10 <sup>9</sup> /L)       | 0.02 (0.01,0.03)  | 476 (14.5%)  |                       |
|                                                         | Absolute value of eosinophil_max (10 <sup>9</sup> /L)     | 0.11 (0.05,0.21)  | 473 (14.41%) |                       |
|                                                         | Absolute value of eosinophil_median (10 <sup>9</sup> /L)  | 0.09 (0.04,0.16)  | 473 (14.41%) |                       |
|                                                         | Absolute value of eosinophil_min (10 <sup>9</sup> /L)     | 0.06 (0.01,0.13)  | 473 (14.41%) |                       |
|                                                         | Absolute value of monocytes_max (10 <sup>9</sup> /L)      | 0.63 (0.45,0.87)  | 463 (14.1%)  |                       |
|                                                         | Absolute value of monocytes_median (10 <sup>9</sup> /L)   | 0.57 (0.42,0.75)  | 463 (14.1%)  |                       |
|                                                         | Absolute value of monocytes_min (10 <sup>9</sup> /L)      | 0.5 (0.36,0.67)   | 463 (14.1%)  |                       |
|                                                         | Absolute value of neutrophils_max (10 <sup>9</sup> /L)    | 6.59 (4.66,9.06)  | 463 (14.1%)  |                       |
|                                                         | Absolute value of neutrophils_median (10 <sup>9</sup> /L) | 5.98 (4.41,7.92)  | 463 (14.1%)  |                       |
|                                                         | Absolute value of neutrophils_min (10 <sup>9</sup> /L)    | 5.22 (3.99,6.9)   | 463 (14.1%)  |                       |
|                                                         | Alanine aminotransferase_max (IU/L)                       | 40 (25,65)        | 473 (14.41%) |                       |
|                                                         | Alanine aminotransferase_median (IU/L)                    | 36 (23,56)        | 473 (14.41%) |                       |
|                                                         | Alanine aminotransferase_min (IU/L)                       | 32 (20,49)        | 473 (14.41%) |                       |
|                                                         | Albumin_max (g/L)                                         | 39.6 (36.8,42.3)  | 472 (14.38%) |                       |
|                                                         | Albumin_median (g/L)                                      | 38.6 (35.65,41.6) | 472 (14.38%) |                       |
|                                                         | Albumin_min (g/L)                                         | 37.9 (34.3,41.2)  | 472 (14.38%) |                       |
|                                                         | Alkaline phosphatase_max (IU/L)                           | 82 (67,101.75)    | 473 (14.41%) |                       |
|                                                         | Alkaline phosphatase_median (IU/L)                        | 79 (66,96.38)     | 473 (14.41%) |                       |
|                                                         | Alkaline phosphatase_min (IU/L)                           | 75 (63,92)        | 473 (14.41%) |                       |
| Anion gap_max (mmol/L)                                  | 19.3 (16.9,21.8)                                          | 303 (9.23%)       |              |                       |

|                                                |                      |              |  |
|------------------------------------------------|----------------------|--------------|--|
| Anion_gap_median (mmol/L)                      | 18 (16.1,20.15)      | 303 (9.23%)  |  |
| Anion_gap_min (mmol/L)                         | 16.6 (14.6,18.9)     | 303 (9.23%)  |  |
| Aspartate aminotransferase_max (IU/L)          | 66 (33,182)          | 469 (14.29%) |  |
| Aspartate aminotransferase_median (IU/L)       | 54 (29.13,126)       | 469 (14.29%) |  |
| Aspartate aminotransferase_min (IU/L)          | 40 (25,84)           | 469 (14.29%) |  |
| AST/ALT_max                                    | 1.99 (1.16,3.83)     | 472 (14.38%) |  |
| AST/ALT_median                                 | 1.63 (1.01,2.93)     | 472 (14.38%) |  |
| AST/ALT_min                                    | 1.31 (0.85,2.37)     | 472 (14.38%) |  |
| Average red blood cell HGB content_max (pg)    | 30.7 (29.58,31.9)    | 463 (14.1%)  |  |
| Average red blood cell HGB content_median (pg) | 30.5 (29.4,31.7)     | 463 (14.1%)  |  |
| Average red blood cell HGB content_min (pg)    | 30.3 (29.2,31.5)     | 463 (14.1%)  |  |
| Basophil percentage_max (%)                    | 0.3 (0.2,0.5)        | 476 (14.5%)  |  |
| Basophil percentage_median (%)                 | 0.25 (0.15,0.4)      | 476 (14.5%)  |  |
| Basophil percentage_min (%)                    | 0.2 (0.1,0.3)        | 476 (14.5%)  |  |
| Calcium_max (mmol/L)                           | 2.22 (2.13,2.3)      | 312 (9.5%)   |  |
| Calcium_median (mmol/L)                        | 2.17 (2.09,2.26)     | 312 (9.5%)   |  |
| Calcium_min (mmol/L)                           | 2.14 (2.04,2.23)     | 312 (9.5%)   |  |
| Carbon dioxide binding force_max (mmol/L)      | 24.1 (22,26.4)       | 302 (9.2%)   |  |
| Carbon dioxide binding force_median (mmol/L)   | 23.05 (21.1,25)      | 302 (9.2%)   |  |
| Carbon dioxide binding force_min (mmol/L)      | 22 (19.7,24.1)       | 302 (9.2%)   |  |
| Chlorine_max (mmol/L)                          | 104.2 (101.9,106.5)  | 197 (6%)     |  |
| Chlorine_median (mmol/L)                       | 102.95 (100.4,105.2) | 197 (6%)     |  |
| Chlorine_min (mmol/L)                          | 101.7 (98.7,104.3)   | 197 (6%)     |  |

|                                                  |                    |              |  |
|--------------------------------------------------|--------------------|--------------|--|
| Cholesterol_max (mmol/L)                         | 4.06 (3.44,4.79)   | 496 (15.11%) |  |
| Cholesterol_median (mmol/L)                      | 3.89 (3.3,4.62)    | 496 (15.11%) |  |
| Cholesterol_min (mmol/L)                         | 3.77 (3.14,4.5)    | 496 (15.11%) |  |
| Creatine kinase isoenzyme MB mass_max (ng/ml)    | 15.7 (3.35,112)    | 150 (4.57%)  |  |
| Creatine kinase isoenzyme MB mass_median (ng/ml) | 7.43 (2.61,48.95)  | 150 (4.57%)  |  |
| Creatine kinase isoenzyme MB mass_min (ng/ml)    | 3.57 (1.93,14.86)  | 150 (4.57%)  |  |
| Creatine kinase_max (IU/L)                       | 299 (103.5,1295)   | 496 (15.11%) |  |
| Creatine kinase_median (IU/L)                    | 210 (87,802)       | 496 (15.11%) |  |
| Creatine kinase_min (IU/L)                       | 141 (70,475.5)     | 496 (15.11%) |  |
| Creatinine_max (umol/L)                          | 84 (71,106)        | 303 (9.23%)  |  |
| Creatinine_median (umol/L)                       | 81 (68.5,99.5)     | 303 (9.23%)  |  |
| Creatinine_min (umol/L)                          | 77 (65.7,94)       | 303 (9.23%)  |  |
| Serum cystatin C_max (mg/L)                      | 1.06 (0.92,1.34)   | 419 (12.76%) |  |
| Serum cystatin C_median (mg/L)                   | 1.04 (0.9,1.28)    | 419 (12.76%) |  |
| Serum cystatin C_min (mg/L)                      | 1.01 (0.88,1.22)   | 419 (12.76%) |  |
| Direct bilirubin_max (umol/L)                    | 4.9 (3.6,6.9)      | 473 (14.41%) |  |
| Direct bilirubin_median (umol/L)                 | 4.5 (3.35,6.2)     | 473 (14.41%) |  |
| Direct bilirubin_min (umol/L)                    | 4.1 (3.1,5.7)      | 473 (14.41%) |  |
| Globulin_max (g/L)                               | 26.8 (24.1,30)     | 472 (14.38%) |  |
| Globulin_median (g/L)                            | 25.95 (23.4,28.75) | 472 (14.38%) |  |
| Globulin_min (g/L)                               | 25.1 (22.5,27.7)   | 472 (14.38%) |  |
| Glucose_max (mmol/L)                             | 7.14 (5.79,10.06)  | 480 (14.62%) |  |
| Glucose_median (mmol/L)                          | 6.62 (5.57,8.79)   | 480 (14.62%) |  |



|                                             |                     |              |  |
|---------------------------------------------|---------------------|--------------|--|
| Glucose_min (mmol/L)                        | 6.08 (5.2,7.78)     | 480 (14.62%) |  |
| Glutamyl transpeptidase_max (IU/L)          | 37 (21,74)          | 473 (14.41%) |  |
| Glutamyl transpeptidase_median (IU/L)       | 34.5 (20,66)        | 473 (14.41%) |  |
| Glutamyl transpeptidase_min (IU/L)          | 31 (19,58)          | 473 (14.41%) |  |
| Hematocrit_max (L/L)                        | 0.4 (0.37,0.44)     | 463 (14.1%)  |  |
| Hematocrit_median (L/L)                     | 0.4 (0.36,0.43)     | 463 (14.1%)  |  |
| Hematocrit_min (L/L)                        | 0.39 (0.34,0.43)    | 463 (14.1%)  |  |
| Hemoglobin_max (g/L)                        | 133 (120,146)       | 463 (14.1%)  |  |
| Hemoglobin_median (g/L)                     | 130 (116,143)       | 463 (14.1%)  |  |
| Hemoglobin_min (g/L)                        | 128 (112,142)       | 463 (14.1%)  |  |
| High density lipoprotein_max (mmol/L)       | 1.1 (0.9,1.31)      | 496 (15.11%) |  |
| High density lipoprotein_median (mmol/L)    | 1.04 (0.86,1.26)    | 496 (15.11%) |  |
| High density lipoprotein_min (mmol/L)       | 0.99 (0.8,1.23)     | 496 (15.11%) |  |
| Hydroxybutyrate dehydrogenase_max (IU/L)    | 342 (197,671)       | 497 (15.14%) |  |
| Hydroxybutyrate dehydrogenase_median (IU/L) | 308 (185.13,577.63) | 497 (15.14%) |  |
| Hydroxybutyrate dehydrogenase_min (IU/L)    | 269 (171,493)       | 497 (15.14%) |  |
| Indirect bilirubin_max (umol/L)             | 8.3 (5.8,12.1)      | 473 (14.41%) |  |
| Indirect bilirubin_median (umol/L)          | 7.4 (5.1,10.6)      | 473 (14.41%) |  |
| Indirect bilirubin_min (umol/L)             | 6.6 (4.4,9.6)       | 473 (14.41%) |  |
| Lactate dehydrogenase_max (IU/L)            | 380 (231,709)       | 497 (15.14%) |  |
| Lactate dehydrogenase_median (IU/L)         | 343.5 (220,610.75)  | 497 (15.14%) |  |
| Lactate dehydrogenase_min (IU/L)            | 304 (205.25,525.75) | 497 (15.14%) |  |
| Low density lipoprotein_max (mmol/L)        | 2.3 (1.79,2.9)      | 496 (15.11%) |  |

|                                                       |                      |              |  |
|-------------------------------------------------------|----------------------|--------------|--|
| Low density lipoprotein_median (mmol/L)               | 2.16 (1.67,2.74)     | 496 (15.11%) |  |
| Low density lipoprotein_min (mmol/L)                  | 2.07 (1.56,2.66)     | 496 (15.11%) |  |
| Lymphocyte absolute value_max (10 <sup>9</sup> /L)    | 1.52 (1.15,1.95)     | 463 (14.1%)  |  |
| Lymphocyte absolute value_median (10 <sup>9</sup> /L) | 1.39 (1.04,1.82)     | 463 (14.1%)  |  |
| Lymphocyte absolute value_min (10 <sup>9</sup> /L)    | 1.28 (0.89,1.73)     | 463 (14.1%)  |  |
| Lymphocyte percentage_max (%)                         | 20.1 (14.3,26)       | 463 (14.1%)  |  |
| Lymphocyte percentage_median (%)                      | 17.6 (12.3,23.7)     | 463 (14.1%)  |  |
| Lymphocyte percentage_min (%)                         | 15.6 (9.6,22.5)      | 463 (14.1%)  |  |
| Magnesium_max (mmol/L)                                | 0.88 (0.82,0.94)     | 312 (9.5%)   |  |
| Magnesium_median (mmol/L)                             | 0.86 (0.81,0.91)     | 312 (9.5%)   |  |
| Magnesium_min (mmol/L)                                | 0.83 (0.78,0.89)     | 312 (9.5%)   |  |
| Mean erythrocyte HGB concentration_max (g/L)          | 332 (324,339)        | 463 (14.1%)  |  |
| Mean erythrocyte HGB concentration_median (g/L)       | 329 (322,336)        | 463 (14.1%)  |  |
| Mean erythrocyte HGB concentration_min (g/L)          | 327 (319,334)        | 463 (14.1%)  |  |
| Mean erythrocyte volume_max (fL)                      | 93.2 (90,96.6)       | 463 (14.1%)  |  |
| Mean erythrocyte volume_median (fL)                   | 92.6 (89.4,96)       | 463 (14.1%)  |  |
| Mean erythrocyte volume_min (fL)                      | 92 (88.7,95.3)       | 463 (14.1%)  |  |
| Measurement of serum of lha_max (mmol/L)              | 0.15 (0.09,0.39)     | 303 (9.23%)  |  |
| Measurement of serum of lha_median (mmol/L)           | 0.12 (0.08,0.24)     | 303 (9.23%)  |  |
| Measurement of serum of lha_min (mmol/L)              | 0.08 (0.06,0.14)     | 303 (9.23%)  |  |
| Myoglobin_max (ng/ml)                                 | 67.14 (33.1,233.5)   | 150 (4.57%)  |  |
| Myoglobin_median (ng/ml)                              | 50.53 (29.54,121.47) | 150 (4.57%)  |  |
| Myoglobin_min (ng/ml)                                 | 37.02 (24.72,66.41)  | 150 (4.57%)  |  |

|                                            |                    |              |  |
|--------------------------------------------|--------------------|--------------|--|
| Percentage of eosinophil_max (%)           | 1.5 (0.6,3)        | 473 (14.41%) |  |
| Percentage of eosinophil_median (%)        | 1.1 (0.4,2.25)     | 473 (14.41%) |  |
| Percentage of eosinophil_min (%)           | 0.7 (0.1,1.8)      | 473 (14.41%) |  |
| Percentage of monocytes_max (%)            | 7.8 (6.2,9.4)      | 463 (14.1%)  |  |
| Percentage of monocytes_median (%)         | 7.1 (5.75,8.55)    | 463 (14.1%)  |  |
| Percentage of monocytes_min (%)            | 6.4 (4.9,8)        | 463 (14.1%)  |  |
| Percentage of neutrophils_max (%)          | 75.3 (67.3,82.9)   | 463 (14.1%)  |  |
| Percentage of neutrophils_median (%)       | 72.63 (65.9,78.96) | 463 (14.1%)  |  |
| Percentage of neutrophils_min (%)          | 69.6 (63.4,76.23)  | 463 (14.1%)  |  |
| Platelet count_max (10 <sup>9</sup> /L)    | 179 (137,231)      | 463 (14.1%)  |  |
| Platelet count_median (10 <sup>9</sup> /L) | 167 (128.38,214)   | 463 (14.1%)  |  |
| Platelet count_min (10 <sup>9</sup> /L)    | 156 (119,202)      | 463 (14.1%)  |  |
| Potassium_max (mmol/L)                     | 4.26 (3.99,4.59)   | 197 (6%)     |  |
| Potassium_median (mmol/L)                  | 4.09 (3.87,4.35)   | 197 (6%)     |  |
| Potassium_min (mmol/L)                     | 3.91 (3.66,4.19)   | 197 (6%)     |  |
| Proportion of white balls_max              | 1.55 (1.36,1.76)   | 472 (14.38%) |  |
| Proportion of white balls_median           | 1.48 (1.29,1.7)    | 472 (14.38%) |  |
| Proportion of white balls_min              | 1.44 (1.23,1.64)   | 472 (14.38%) |  |
| RBC distribution width CV_max (%)          | 13.6 (13,14.4)     | 463 (14.1%)  |  |
| RBC distribution width CV_median (%)       | 13.4 (12.9,14.25)  | 463 (14.1%)  |  |
| RBC distribution width CV_min (%)          | 13.3 (12.8,14.1)   | 463 (14.1%)  |  |
| RBC distribution width SD_max (fL)         | 45.8 (43.1,48.9)   | 463 (14.1%)  |  |
| RBC distribution width SD_median (fL)      | 45.2 (42.75,48.1)  | 463 (14.1%)  |  |

|                                                   |                    |              |  |
|---------------------------------------------------|--------------------|--------------|--|
| RBC distribution width SD_min (fL)                | 44.5 (42.2,47.3)   | 463 (14.1%)  |  |
| Red blood cell count_max (10 <sup>12</sup> /L)    | 4.36 (3.95,4.78)   | 463 (14.1%)  |  |
| Red blood cell count_median (10 <sup>12</sup> /L) | 4.26 (3.81,4.69)   | 463 (14.1%)  |  |
| Red blood cell count_min (10 <sup>12</sup> /L)    | 4.19 (3.69,4.65)   | 463 (14.1%)  |  |
| Serum inorganic phosphorus_max (mmol/L)           | 1.06 (0.91,1.23)   | 311 (9.47%)  |  |
| Serum inorganic phosphorus_median (mmol/L)        | 0.99 (0.85,1.13)   | 311 (9.47%)  |  |
| Serum inorganic phosphorus_min (mmol/L)           | 0.91 (0.76,1.07)   | 311 (9.47%)  |  |
| Sodium_max (mmol/L)                               | 141 (139.1,143)    | 197 (6%)     |  |
| Sodium_median (mmol/L)                            | 139.98 (138,141.7) | 197 (6%)     |  |
| Sodium_min (mmol/L)                               | 138.9 (136.7,141)  | 197 (6%)     |  |
| Total protein_max (g/L)                           | 66.3 (62.2,70.1)   | 472 (14.38%) |  |
| Total protein_median (g/L)                        | 64.7 (61,68.6)     | 472 (14.38%) |  |
| Total protein_min (g/L)                           | 63.4 (59.35,67.7)  | 472 (14.38%) |  |
| Urea_max (mmol/L)                                 | 6.4 (4.9,9)        | 419 (12.76%) |  |
| Urea_median (mmol/L)                              | 6.04 (4.7,8)       | 419 (12.76%) |  |
| Urea_min (mmol/L)                                 | 5.58 (4.39,7.2)    | 419 (12.76%) |  |
| Total bilirubin_max (umol/L)                      | 13.35 (9.7,19.1)   | 473 (14.41%) |  |
| Total bilirubin_median (umol/L)                   | 12.1 (8.9,16.99)   | 473 (14.41%) |  |
| Total bilirubin_min (umol/L)                      | 11 (7.9,15.4)      | 473 (14.41%) |  |
| triglycerides_max (mmol/L)                        | 1.48 (1.1,2.05)    | 496 (15.11%) |  |
| triglycerides_median (mmol/L)                     | 1.37 (1.02,1.85)   | 496 (15.11%) |  |
| triglycerides_min (mmol/L)                        | 1.25 (0.93,1.72)   | 496 (15.11%) |  |
| Troponin -T_max (ng/L)                            | 1828 (408.5,4854)  | 134 (4.08%)  |  |

|                                                         |                                                    |                            |             |                                           |
|---------------------------------------------------------|----------------------------------------------------|----------------------------|-------------|-------------------------------------------|
|                                                         | Troponin -T_median (ng/L)                          | 1395 (313.85,3813.75)      | 134 (4.08%) |                                           |
|                                                         | Troponin -T_min (ng/L)                             | 900.3 (174.1,2736)         | 134 (4.08%) |                                           |
|                                                         | Urinary sodium_max (pg/ml)                         | 1729 (704.5,4446)          | 237 (7.22%) |                                           |
|                                                         | Urinary sodium_median (pg/ml)                      | 1460.75 (622.25,3554.5)    | 237 (7.22%) |                                           |
|                                                         | Urinary sodium_min (pg/ml)                         | 1160 (487,2714)            | 237 (7.22%) |                                           |
|                                                         | White blood cell count_max (10 <sup>9</sup> /L)    | 8.93 (6.94,11.48)          | 463 (14.1%) |                                           |
|                                                         | White blood cell count_median (10 <sup>9</sup> /L) | 8.28 (6.61,10.31)          | 463 (14.1%) |                                           |
|                                                         | White blood cell count_min (10 <sup>9</sup> /L)    | 7.55 (6.05,9.47)           | 463 (14.1%) |                                           |
| <b>Cost information</b><br>(Median (1th, 3th quartile)) | Total expenses                                     | 47186.6 (30662.9,59242.4)  | 0 (0%)      |                                           |
|                                                         | Treatment expenses                                 | 438.38 (207,955.5)         | 0 (0%)      |                                           |
|                                                         | Examination expenses                               | 470 (368,649)              | 0 (0%)      | e.g., Magnetic resonance                  |
|                                                         | CT (Computed Tomography) expenses                  | 0 (0,0)                    | 0 (0%)      |                                           |
|                                                         | Materials expenses                                 | 27352.88 (15366.9,42160.1) | 0 (0%)      |                                           |
|                                                         | Nursing expenses                                   | 167 (101,292.1)            | 0 (0%)      |                                           |
|                                                         | Laboratory test expenses                           | 1462.75 (1063,2268.4)      | 0 (0%)      | e.g., Blood routine examination           |
|                                                         | Bed expenses                                       | 222 (128,411)              | 0 (0%)      |                                           |
|                                                         | Custody expenses                                   | 230.05 (118.9,491.6)       | 0 (0%)      |                                           |
|                                                         | Intervention expenses                              | 5630 (4950,5630)           | 0 (0%)      | e.g., The placement of cardiac pacemaker. |
|                                                         | Cooling and heating expenses                       | 12 (6,21)                  | 0 (0%)      |                                           |
|                                                         | Surgery expenses                                   | 0 (0,0)                    | 0 (0%)      |                                           |
|                                                         | Surgical materials expenses                        | 17.2 (0,59.6)              | 0 (0%)      |                                           |
|                                                         | Western medicine expenses                          | 2618.2 (1921,3992.2)       | 0 (0%)      |                                           |
| Diagnostic examination expenses                         | 42 (28,70)                                         | 0 (0%)                     |             |                                           |

|  |                 |                |        |  |
|--|-----------------|----------------|--------|--|
|  | Board expenses  | 133 (48,259.2) | 0 (0%) |  |
|  | Oxygen expenses | 80 (40,209.4)  | 0 (0%) |  |

ICD-10: the 10th revision of the International Statistical Classification of Diseases; ICD-9-CM-3: International classification of diseases clinical modification of 9th revision operations and procedures.
