# Supplementary material for: A stacking-based model for predicting 30-day all-cause hospital readmissions of patients with acute myocardial infarction
Source: Springer Nature journal article supplement (doi:10.1186/s12911-020-01358-w), 2020-12-01
Supplement: MOESM2 [file 18681836]

## Additional file 2

The results of five-fold cross-validation on the training set of the eight candidate models in different class imbalance treatment techniques.

| Model   | Cost-sensitive    | SMOTE            | NCR               |
|---------|-------------------|------------------|-------------------|
| DT      | 0.640±0.05        | 0.597±0.04       | <b>0.690±0.03</b> |
| SVM     | <b>0.694±0.04</b> | 0.655±0.01       | 0.66±0.02         |
| RF      | 0.707±0.03        | 0.702±0.04       | <b>0.709±0.03</b> |
| ET      | 0.711±0.04        | 0.681±0.03       | <b>0.716±0.03</b> |
| GB      | 0.696±0.03        | 0.702±0.03       | <b>0.708±0.02</b> |
| ADB     | 0.586±0.03        | <b>0.69±0.03</b> | 0.662±0.04        |
| Bagging | 0.701±0.03        | 0.694±0.03       | <b>0.713±0.03</b> |
| XGB     | 0.692±0.03        | 0.705±0.04       | <b>0.716±0.02</b> |

font bold: the better values. *DT*: decision tree; *SVM*: support vector machine; *RF*: random forest; *ET*: extra trees; *GBDT*: gradient boosting decision tree; *ADB*: adaBoost; *Bagging*: bootstrap aggregating; *XGB*: extreme gradient boosting
